# Supplementary material for: Sequence Identification, Recombinant Production, and Analysis of the Self-Assembly of Egg Stalk Silk Proteins from Lacewing Chrysoperla carnea
Source: MDPI journal article supplement (doi:10.3390/biom7020043), 2017-06-13
Supplement: s1 [file s1]

## Supplementary Information:

**Table S1.** Overview of synthetic oligonucleotides used in this study.

| <b>cDNA synthesis</b>                                                                                                                                                   |                                                              |
|-------------------------------------------------------------------------------------------------------------------------------------------------------------------------|--------------------------------------------------------------|
| Mod. oligo-d(T) <sub>18</sub>                                                                                                                                           | TGGTTTTTTTTTTTTTTTTTTT                                       |
| ChryC3_cDNA                                                                                                                                                             | TTATCAATAGCAGTTTCAGTGAAAAATTTAACAAGAGCAGTCATCAGAATCATCAGAATC |
| Template-switch                                                                                                                                                         | AAGCAGTGGTATCAACGCAGAGTCTCGAG(GGG)                           |
|                                                                                                                                                                         |                                                              |
| <b>PCR for TA-cloning into pGEM-T vector</b>                                                                                                                            |                                                              |
| ChryC1 forw                                                                                                                                                             | GGGTGCAATGTGATC                                              |
| ChryC2 forw                                                                                                                                                             | AATTATAATATTTGGAGTAATG                                       |
| Poly-Ala-stretch                                                                                                                                                        | GCAGCAGCAGCGGC                                               |
| As reverse-primer, modified oligo-d(T) <sub>18</sub> was used for both ChryC1 (including all transcript variants), ChryC2, and the first identified fragment of ChryC3. |                                                              |
| Anchor forw (for ChryC3)                                                                                                                                                | AAGCAGTGGTATCAACGCAGAG                                       |
| ChryC3 rev                                                                                                                                                              | GTACCAGTACTCGAGTGCATTTTCAG                                   |
|                                                                                                                                                                         |                                                              |
| <b>Restriction-free cloning of ChryC1-3 into expression vector</b>                                                                                                      |                                                              |
| ChryC1_forw                                                                                                                                                             | GGACAGCAATGGGGTCGCGGATCCATGGGTGGTTGCAATGTGATCGCCTACCCAAC     |
| ChryC1_rev                                                                                                                                                              | GGTGCTCGAGTGC GGCCGCAAGCTTTCATTAACAAGAACAATCATCAGAATCATCAG   |
| ChryC2_forw                                                                                                                                                             | GGACAGCAATGGGGTCGCGGATCCATGGGTAAATTATAATATTTGGAGTAATGTGAACG  |
| ChryC2_rev                                                                                                                                                              | GTGGTGCTCGAGTGC GGCCGCAAGCTTTCATTAACATTCATAATCGTAATAATCGTC   |
| ChryC3_forw                                                                                                                                                             | GGACAGCAATGGGGTCGCGGATCCATGGGTTTTGTGGTTCGCTTACCATG           |
| ChryC3_rev                                                                                                                                                              | GCTCGAGTGC GGCCGCAAGCTTTCATTAACAAGAGCAGTCATCAGAATCATC        |
|                                                                                                                                                                         |                                                              |
| <b>Sequencing of elongation factor 1 alpha (EF-1α)</b>                                                                                                                  |                                                              |
| EF-1a_gen_f                                                                                                                                                             | GGGTGTCAAACAATTGATTGTCTG                                     |
| EF-1a_gen_r                                                                                                                                                             | ACCAGCTACGTATCCTCTTCTG                                       |
|                                                                                                                                                                         |                                                              |
| <b>Colony PCR</b>                                                                                                                                                       |                                                              |
| universe(pUC)                                                                                                                                                           | AGGGTTTTCCCAGTCACGACGTT                                      |
| reverse(pUC)                                                                                                                                                            | GAGCGGATAACAATTCACACAGG                                      |
|                                                                                                                                                                         |                                                              |
| <b>qPCR</b>                                                                                                                                                             |                                                              |
| qPCR-EF-f                                                                                                                                                               | GTCTTCCTCTCCAGGATGTCTAC                                      |
| qPCR-EF-r                                                                                                                                                               | AGCGAATACTACAACCATACTGG                                      |
| qPCR-C1-f                                                                                                                                                               | GGATCAGGTTTCAGCAAGTTCAGG                                     |
| qPCR-C1-r                                                                                                                                                               | AAGCTGCTCCAGATGCTGCAG                                        |
| qPCR-C1s2-f                                                                                                                                                             | ATCAACTGCGACTGCAAGTAAAGAC                                    |
| qPCR-C1s2-r                                                                                                                                                             | ATGCTCCCGATGCAGCTGAG                                         |

|           |                          |
|-----------|--------------------------|
| qPCR-C2-f | TGGATCATCAGCTCCGGTTCG    |
| qPCR-C2-r | TCCCGAACCGGATGAGGAGC     |
| qPCR-C3-f | TCCACCTAATTGTGGTTCATCAGG |
| qPCR-C3-r | ACGCTGCGCCTGAACCAGAG     |

All sequences are indicated according to 5'-3' nomenclature. RNA-nucleotides are given in parentheses. "qPCR-C1-f" and "qPCR-C1-r" were designed to bind at a conserved region encoding the N-terminal domain of ChryC1, being able to amplify both the full-length construct of ChryC1 and all known transcript variants of ChryC1. In order to prevent both unspecific binding of qPCR primers to competing silk-encoding proteins and formation of primer-dimers, all qPCR primers were analyzed using bioinformatics tools (NCBI primer-BLAST and OligoAnalyzer 3.1). First partial sequencing of ChryC3 was achieved by PCR using "Poly-Ala-stretch" as forward and "Mod. oligo-d(T)<sub>18</sub>" as reverse primers, respectively.

**Table S2.** Melting temperatures ( $T_m$ ) of qPCR products amplified in this study, including standard deviation (s.d.).

| <b>sample</b>      | <b>average <math>T_m</math> [°C]</b> | <b>s.d.</b> |
|--------------------|--------------------------------------|-------------|
| cDNA female EF-1a  | 79.0                                 | 0.1         |
| cDNA male EF-1a    | 79.1                                 | 0.06        |
| cDNA female ChryC1 | 85.5                                 | 0.17        |
| cDNA female        | 83.3                                 | 0.17        |
| cDNA female ChryC2 | 85.6                                 | 0.06        |
| cDNA female ChryC3 | 86.8                                 | 0.06        |

GCNVIAYPTASC GDSGSGSGSASSGAASGAASGSGAASGSGAASGSGSAAAASGAASGSGSAAGSGAASGSGSAAGSG  
 AASGSGSAAGSGAASGSGSAAGSGAASGSGSGSSSSGSSSSGSSGGCGGGSGSASSG  
 GSSASATKNSAGASSN  
 GSSAGASNGSAGASSG  
 GSSASATKNSAGASSG  
 SSSAGASNGSAGASSC  
 GSSATATKNSAGASSG  
 GSTAGASNGSAGASSG  
 GSSSSATKNSAGASSN  
 GSSAGASNGSAGASSG  
 GSSSSATQNSAGASSN  
 GSSAGASNGSAGASSG  
 GSSSSATQNSAGASSN  
 GSSAGASNGTAGASSG  
 GSSSSATKESAGASSN  
 GSTATASKDSAGASSG  
 GSSVGATASGAGAASGGSVSSATKNSSAASSQGSSVSI SNGVVSAASNGATTSAGAGSASSASGGSSANVGG  
 GSASGSSN  
 GATSSANGSSASGSSG  
 GSSSSAGAGSASGSSG  
 NSSSSASGNTASGSSG  
 DSSSSAGSGTASGSSG  
 GATSTAGSGSASGSSG  
 SSSSSAGSGSASGSSG  
 NSSSSASGGTASGSSN  
 GATSSAGSGTASGSSG  
 GSSSSAGSGTASGSSG  
 DSSSSAGSGSASGSSG  
 GATSSAGSGSASGSSG  
 NSSSSAGSGSASGSSG  
 DSSSSAGSGSASGSSG  
 GATSTAGSGSASGSSG  
 NSSSSAGSGSASGSSG  
 DSSSSAGSGSASGSSG  
 GASSSAGSGSASGSSC  
 GSTSGASSGSASGSSG  
 GSSSSAGSGSASGASG  
 GSSSAAGSGSASGSSG  
 GSTSGASC GSASGSSG  
 DSSSSAGSGSASGSSG  
 GASSSAGSGSASGSSG  
 GSTSGASSGSASGSSG  
 GSSSSAGSGSASGASAGSSSAAGSGSASGSSGGSSSGASSGSSDGC GSGGSSGAASGAASGSGSASGSGAASGSGAA  
 SGSGAASGSGAASGSGAASGSGAASGSGAASGSGSASGLGSAASSGAASSSGSAAGSGSASGSGSAASSGAASSSGS  
 AAGSGSASVSGSSDDSDDCSC

**Figure S1.** Protein sequence of ChryC1. Genbank Accession No.: KY906176.

NYNIWSNVNAHPTNCDNSGGSSGSSASGSGAASGSGSASGSGAASGSSSSGSGSSSSGSGCGSGS  
GSASGSSG  
GSSASASKGSAGASSN  
GSVAGASKGSAGASSG  
GSSASASKGSAGASSG  
SSTAVASKGSAGASSK  
GSSASATKGSAGASSC  
GSTAGASKGAAGASSN  
GSSASASKGSAGASSG  
GSTAGASKGSAGASSN  
GSSATATKGSAGASSG  
NSTAVASKGSAGASSN  
GSSASASKGSAGASSQ  
GSSASATKGSAGATSN  
GSSAVASKGSAGAASG  
NSTASATKGSASSASSN  
GSSAGATKDGAGAASN  
GSTAVASKGSAGAASG  
NSTATASKGSAGASSN  
GSSATATKGSAGATSN  
GSSAVASKGSAGASSG  
NSTASASKGSAGASSN  
GSSASASKGSAGATSA  
GSSAVASKGSAGASSG  
NSTASASKGSAGASSN  
GSSATASKGSAGASSG  
SSSASASKGSAGATSA  
GSSAVASKGSAGASSG  
NSTASASKGSAGASSN  
GSSASASKGSAGATSA  
GSSAAASKGSASASSD  
GSSAACDSGESDAVDKANLAAIANIAAAAGKPSGKSAPS CDDYYDYEC

**Figure S2.** Protein sequence of ChryC2. Genbank Accession No.: KY906177.

GCNVIAYPTASC GDSGSGSGSASSGAASGAASGSGAASGSGAASGSGSAAAASGAASGSGSAAGSGAASGSGSAAGSG  
 AASGSGSAAGSGAASGSGSAAGSGAASGSGSGSSSSGSSSSGSSGGCGGGSGSASSG  
 GSSASATKNSAGASSN  
 GSSAGASNGSAGASSG  
 GSSASATKNSAGASSG  
 SSSAGASNGSAGASSC  
 GSSATATKNSAGASSG  
 GSTAGASNGSAGASSG  
 GSSSSATKNSAGASSN  
 GSSAGASNGSAGASSG  
 GSSSSATQNSAGASSN  
 GSSAGASNGSAGASSG  
 GSSSSATQNSAGASSN  
 GSSAGASNGTAGASSD  
 DSDDCSC

**Figure S3 (a).** Protein sequence of a transcript variant of ChryC1, ChryC1s1. Genbank Accession No.: KY906179.

GCNVIAYPTASC GDSGSGSGSASSGAASGAASGSGAASGSGAASGSGSAAAASGAASGSGSAAGSGAASGSGSAAGSG  
 AASGSGSAAGSGAASGSGSAAGSGAASGSGSGSSSSGSSSSGSSGGCGGGSGSASSG  
 GSSASATKNSAGASSN  
 GSSAGASNGSAGASSG  
 GSSASATKNSAGASSG  
 SSSAGASNGSAGASSC  
 GSSATATKNSAGASSG  
 GSTAGASNGSAGASSG  
 GSSSSATKNSAGASSN  
 GSSAGASNGSAGASSG  
 GSSSSATQNSAGASSN  
 GSSAGASNGSAGASSG  
 GSSSSATQNSAGASSN  
 GSSAGASNGTAGASSG  
 GSSSSATKESAGASSN  
 GSTATASKDSAGASSG  
 GSSVGATASGAGAASGGSVSSATKNSSAASGASAGSSSAAGSGSASGSSGGSSSGASSGSSDGC GSGGSSGAASGAA  
 SSGSGSASGSGAASGSGAASGSGAASGSGAASGSGAASGSGAASGSGAASGSGSASGLGSAASSGAASSSGSAAGSGS  
 ASGSGSAASSGAASSSGSAAGSGSASVSGSSDDSDDCSC

**Figure S3 (b).** Protein sequence of a transcript variant of ChryC1, ChryC1s2. Genbank Accession No.: KY906180. The sequence shown in ochre represents the beginning of the short non-repetitive region which interrupts the two repetitive domains in the full-length construct of ChryC1.

GCNVIAYPTASC GDSGSGSGSASSGAASGAASGSGAASGSGAASGSGSAAAASGAASGSGSAAGSGAASGSGSAAGSG  
 AASGSGSAAGSGAASGSGSAAGSGAASGSGSGSSSSGSSSSGSSGGCGGGSGSASSG  
 GSSASATKNSAGASSN  
 GSSAGASNGSAGASSG  
 GSSASATKNSAGASSG  
 SSSAGASNGSAGASSC  
 GSSATATKNSAGASSG  
 GSTAGASNGSAGASSG  
 GSSSSATKNSAGASSN  
 GSSAGASNGSAGASSG  
 GSSSSATQNSAGASSN  
 GSSAGASNGSAGASSG  
 G...  
     ...GSASGSSG  
 GATSTAGSGSASGSSG  
 NSSSSAGSGSASGSSG  
 DSSSSAGSGSASGSSG  
 SASSSAGSGSASGSSG  
 GSTSGASSGSASGSSG  
 GSSSSAGSGSASGASAGSSSAAGSGSASGSSGGSSSGASSGSSDGC GSGGSSGAASGAASGSGSASGSGSASGSGAA  
 SGSGAASGSGAASGSGAASGSGAASGSGAASGSGAASGSGAASGSGAASGSGAASGSGAASGSGAASGSGAASGSGS  
 ASGSGSAASSGAASSSGSAAGSGSASGSGSSDDSDDCSC

**Figure S3 (c).** Partial protein sequence of a transcript variant of ChryC1, ChryC1s3.

GCNVIAYPTASC GDSGSGSGSASSGAASGAASGSGAASGSGAASGSGSAAAASGAASGSGSAAGSGAASGSGSAAGSG  
 AASGSGSAAGSGAASGSGSAAGSGAASGSGSGSSSSGSSSSGSSGGCGGGSGSASSG  
 GSSASATKNSAGASSN  
 GSSAGASNGSAGASSG  
 GSSASATKSSAGASSG  
 SSSAGASNGSAGASSC  
 GSSATATKNSAGASSG  
 GSTAGASNGSAGASSG  
 GSSSSATKNSAGASSN  
 GSSA...  
     ...SGSASGSSG  
 GSASGASC GSASGSSG  
 DSSSSAGSGSASGSSG  
 GASSSAGSGSASGSSG  
 GSTSGASSGSASGSSG  
 GSSYSAGSGSASGASAGSSSAAGSGSASGSSGGSSSGASSGSSDGC GSGGSSGAASGAASGSGSASGSGSASGSGAA  
 SGSGAASGSGAATGSGAASGSGAASGSGAASGSGAASGSGAASGSGSASGSGSAASSGAASSSGSAAGSGSASGSES  
 AASSGAASSSGSAAGSGSASGSGSSDDSDDCSC

**Figure S3 (d).** Partial protein sequence of a transcript variant of ChryC1, ChryC1s4.

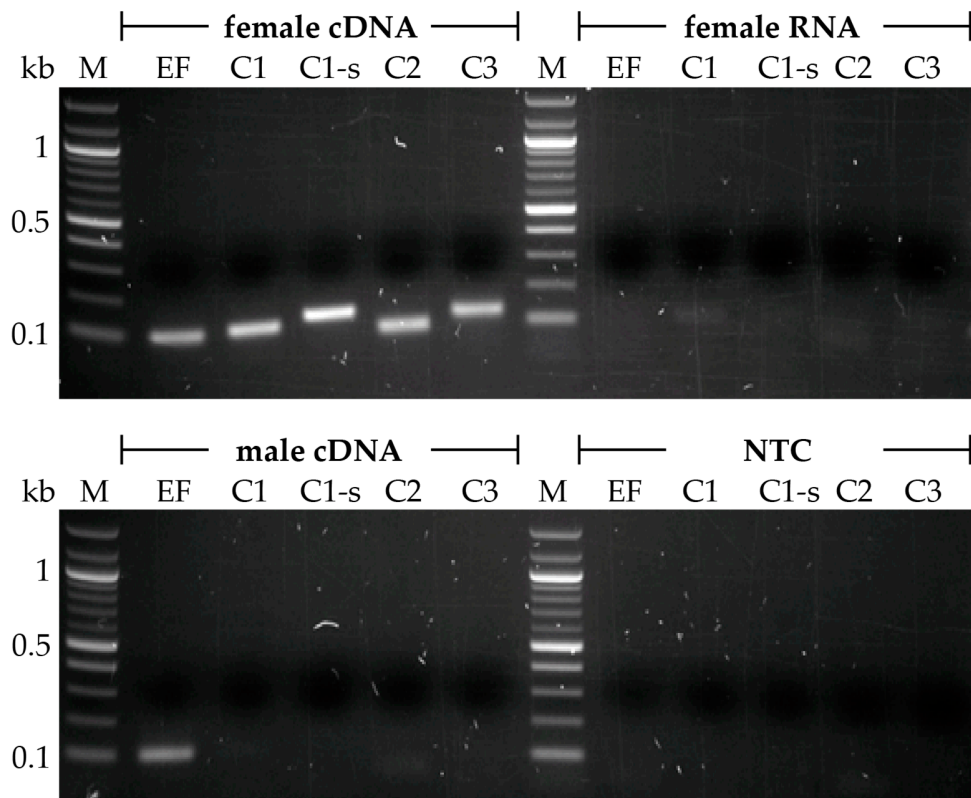

**Figure S4.** 1.5% (w/v) agarose gel of qPCR products. M: Marker, EF: Elongation factor 1 $\alpha$ , C1: ChryC1, C1-s: ChryC1s2, C2: ChryC2, C3: ChryC3, NTC: No template control. Each lane was loaded with 8  $\mu$ l of qPCR-sample.



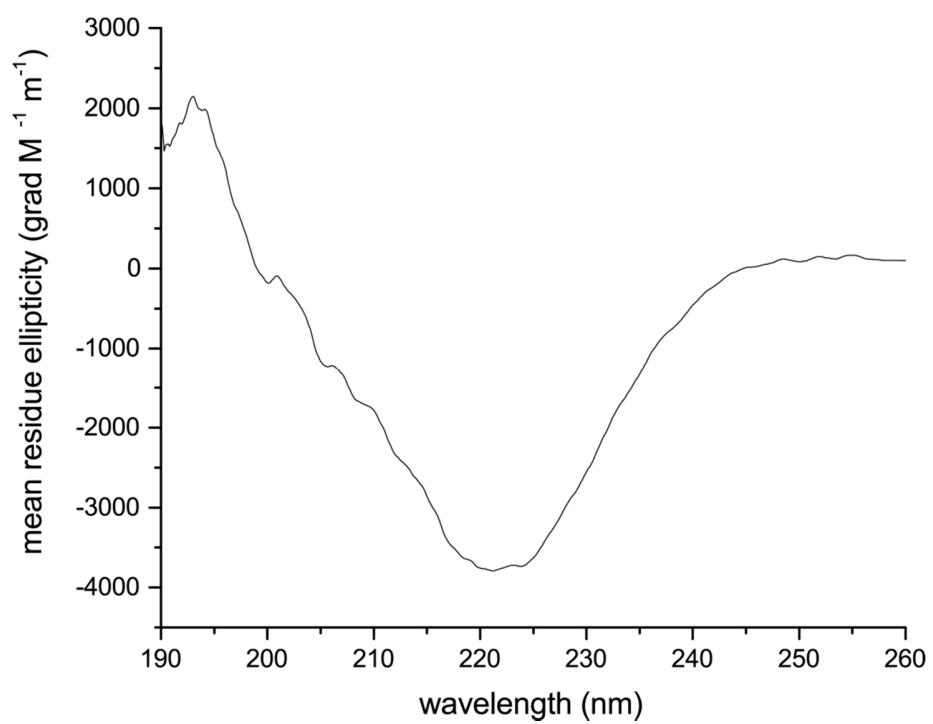

**Figure S5.** CD spectrum of self-assembled ChryC2 fibrils. Measured in 10 mM sodium phosphate, pH 7.5.

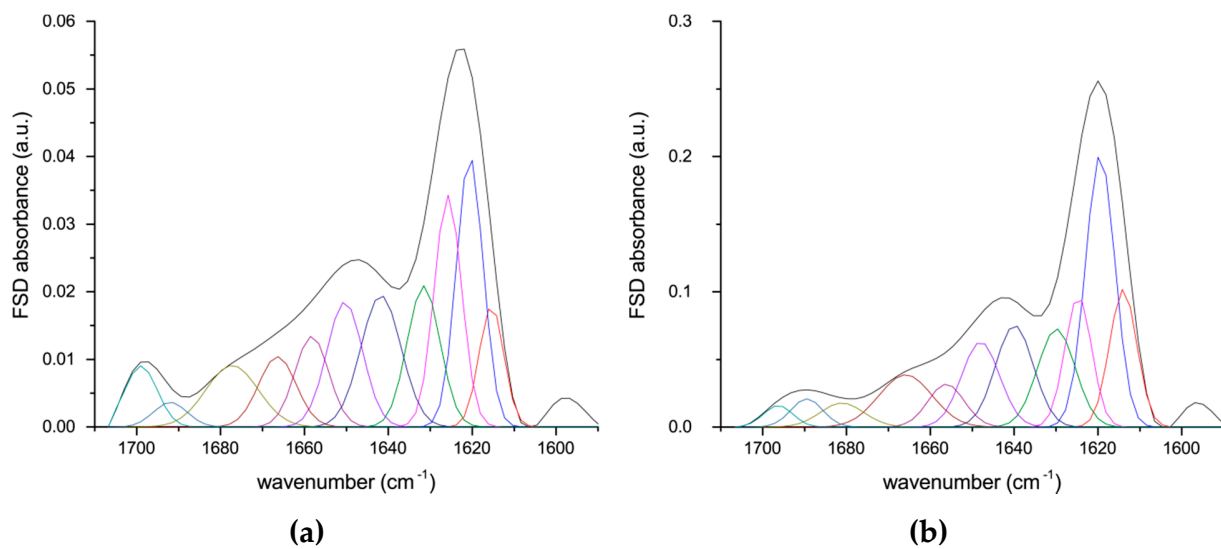

**Figure S6.** Fourier self-deconvolution (FSD) of an exemplary FTIR spectrum of **(a)** a dried ChryC1 film and **(b)** a wet ChryC1 film after incubation in D<sub>2</sub>O.

Insecta  
  Dicondylia  
    Pterygota  
      Neoptera  
        Endopterygota  
          Neuropterida  
            Neuroptera  
              Chrysopidae  
                Chrysoperla  
                  Chrysoperla adamsi  
                  Chrysoperla agilis  
                  Chrysoperla calocedrii  
                  **Chrysoperla carnea**  
                  Chrysoperla furcifera  
                  Chrysoperla mediterranea  
                  Chrysoperla nipponensis  
                Mallada  
                  Mallada albofacialis  
                  Mallada basalis  
                  Mallada boninensis  
                  Mallada clavatus  
                  Mallada desjardinsi  
                  Mallada krakatauensis  
                  **Mallada signata**

**Figure S7.** Phylogenetic tree of lacewings according to NCBI taxonomy. The two species discussed in this study are indicated in bold.
